# Supplementary material
Source: PubMed Central journal article supplement (PMC7047122)
Supplement: Supp_Fig1.pdf [file Supp_Fig1.pdf]

## Supplementary Data

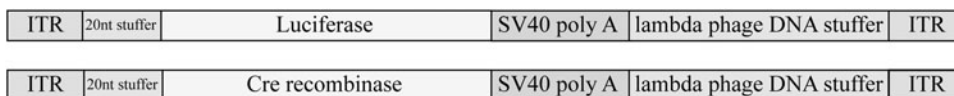

**Supplementary Figure S1.** Schematic of the vector plasmids used in this study. ITR sequences from AAV serotypes 1–4, 6, and 7 were synthesized and cloned into a pUC19 backbone to flank a 20 nt stuffer sequence chosen randomly from lambda phage DNA, followed by the reading frame for luciferase or cre recombinase, an SV40 early polyA signal, and 2,172 nts of lambda phage DNA stuffer sequence. AAV, adeno-associated virus; ITR, inverted terminal repeat; nt, nucleotide.

---
